# Supplementary material for: Prenatal Exposure to Locally Emitted Air Pollutants Is Associated with Birth Weight: An Administrative Cohort Study from Southern Sweden
Source: MDPI journal article supplement (doi:10.3390/toxics10070366), 2022-07-01

**Supplementary Table S1.** Pearson correlations among the investigated local PM<sub>2.5</sub> sources.

|                                       | All-source<br>PM <sub>2.5</sub> | Tailpipe<br>exhaust | Vehicle<br>wear-and-<br>tear | Small-scale<br>residential<br>heating |
|---------------------------------------|---------------------------------|---------------------|------------------------------|---------------------------------------|
| All-source<br>PM <sub>2.5</sub>       | 1                               |                     |                              |                                       |
| Tailpipe<br>exhaust                   | 0.90                            | 1                   |                              |                                       |
| Vehicle<br>wear-and-<br>tear          | 0.88                            | 0.92                | 1                            |                                       |
| Small-scale<br>residential<br>heating | 0.75                            | 0.61                | 0.44                         | 1                                     |

All p-values <0.001.

**Supplementary Table S2.** Decrease and (95% confidence intervals) of birth weight (grams) associated with an inter-quartile range (IQR)\* increase in exposure concentrations of the investigated local PM<sub>2.5</sub> sources during pregnancy. Adjusted for maternal education, annual household disposable income, parity, maternal BMI, maternal smoking at first antenatal visit and: birth year and birth month, gestational days, neighbourhood income levels.

|                                 | Birth year and birth<br>month | Gestational days | Neighbourhood SES |
|---------------------------------|-------------------------------|------------------|-------------------|
| All-source PM <sub>2.5</sub>    | 36 (27-45)                    | 31 (22-39)       | 32 (22-44)        |
| Tailpipe exhaust                | 35 (26-43)                    | 30 (22-39)       | 30 (20-41)        |
| Vehicle wear-and-tear           | 30 (22-38)                    | 29 (21-37)       | 32 (22-43)        |
| Small-scale residential heating | 30 (22-39)                    | 12 (5-19)        | 13 (4-22)         |

\* IQRs: all-source PM<sub>2.5</sub>=0.99 µg/m<sup>3</sup>, tailpipe exhaust=0.12 µg/m<sup>3</sup>, vehicle wear-and-tear=0.31 µg/m<sup>3</sup>, and small-scale residential heating=0.33 µg/m<sup>3</sup>.

**Supplementary Table S3.** Odds ratios and their (95% confidence intervals) of low birth weight (LBW; <2,500 grams) associated with an inter-quartile range (IQR)\* increase in exposure concentrations of the investigated local PM<sub>2.5</sub> sources during pregnancy. Adjusted for maternal education, annual household disposable income, parity, maternal BMI, maternal smoking at first antenatal visit and: birth year and birth month, gestational days, neighbourhood income levels (SES).

|                                           | Birth year and birth<br>month | Gestational days | Neighbourhood SES |
|-------------------------------------------|-------------------------------|------------------|-------------------|
| All-source PM <sub>2.5</sub> <sup>‡</sup> | 1.04 (0.90-1.20)              | 1.01 (0.88-1.17) | 1.06 (0.89-1.25)  |
| Tailpipe exhaust                          | 1.03 (0.90-1.19)              | 1.01 (0.87-1.16) | 1.05 (0.89-1.24)  |
| Vehicle wear-and-tear                     | 1.01 (0.88-1.16)              | 0.92 (0.80-1.11) | 1.05 (0.89-1.24)  |
| Small-scale residential heating           | 1.09 (0.98-1.23)              | 1.14 (1.04-1.26) | 1.13 (1.01-1.27)  |

\* IQRs: all-source PM<sub>2.5</sub>=0.99 µg/m<sup>3</sup>, tailpipe exhaust=0.12 µg/m<sup>3</sup>, vehicle wear-and-tear=0.31 µg/m<sup>3</sup>, and small-scale residential heating=0.33 µg/m<sup>3</sup>.

**Supplementary Figure S1.** Box-plot graphs describing the distributions of PM<sub>2.5</sub> concentration from all local sources, small-scale residential heating, tailpipe exhaust and vehicle wear-and-tear in µg/m<sup>3</sup>.

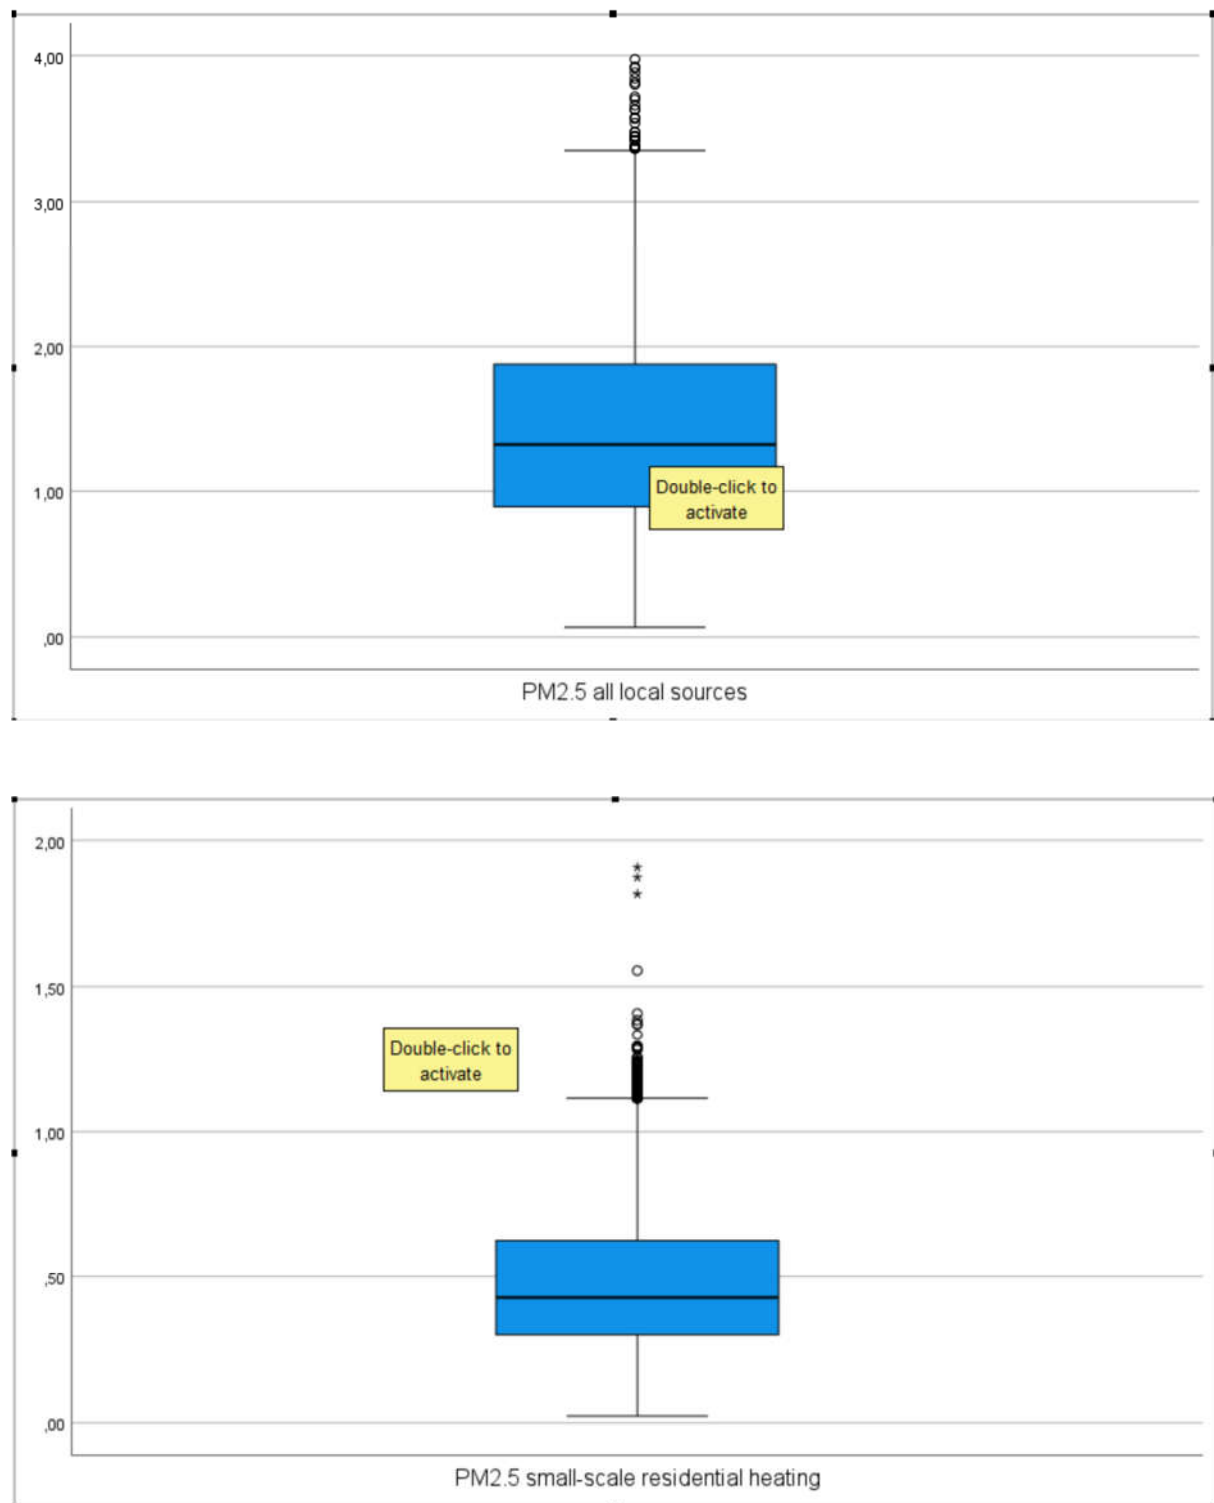

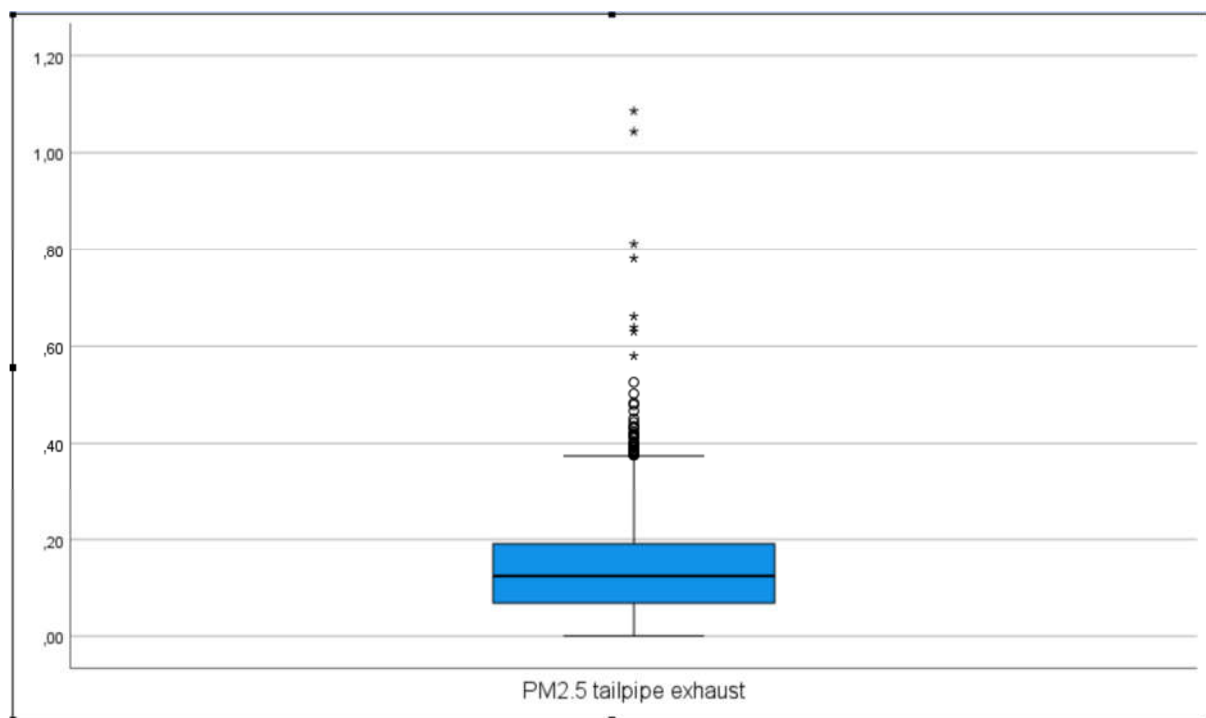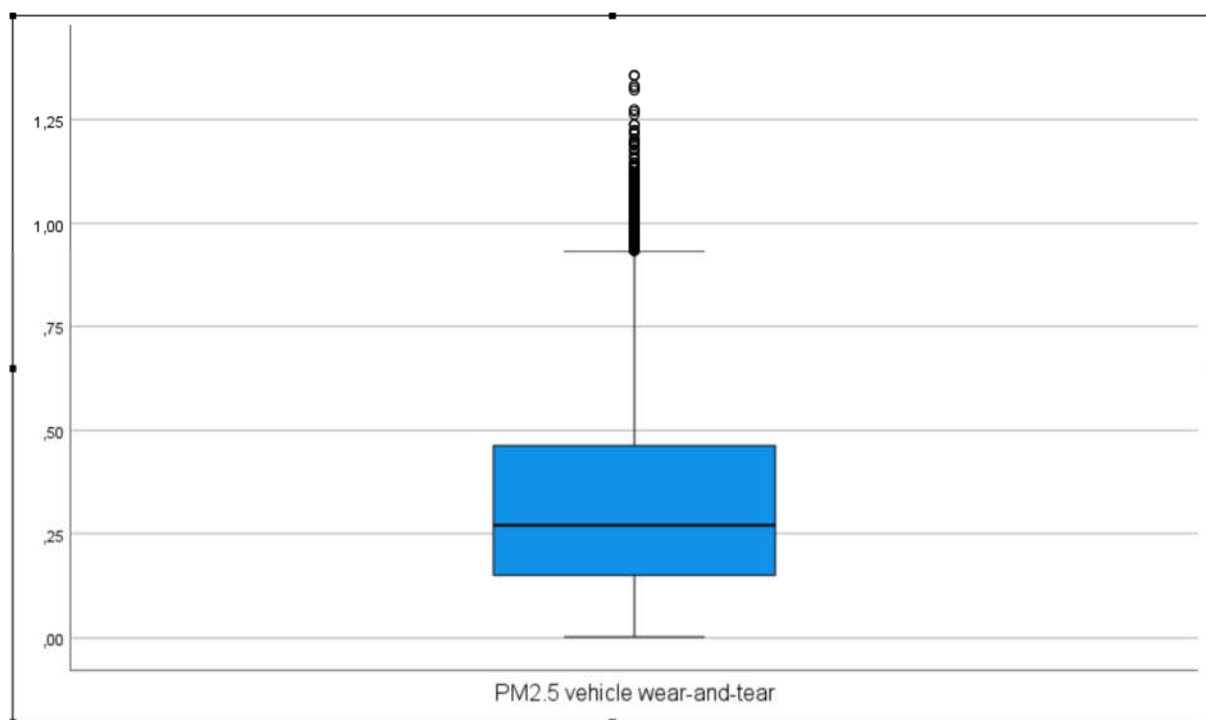

Supplement: s1 [file s1]
